# Supplementary material for: Exploring the molecular profile of localized colon cancer: insights from the AIO Colopredict Plus registry
Source: Frontiers journal article supplement (doi:10.3389/fonc.2024.1434791), 2024-11-19
Supplement: Data_Sheet_1.pdf [file Data_Sheet_1.pdf]

### Suppl. Table 1: Colorectal Cancer Panel

The following genes were analyzed for base substitutions, indels (small insertions and deletions) and gene copy number variations (amplifications, deletions) using next generation sequencing:

*ACVR1B, AKT1, APC, ATM, ATP6V0D2, AXIN2, BAX, BLM, BMPR1A, BRAF, BRCA1, BRCA2, BUB1B, CASP8, CDC27, CDH1, CDK4, CDKN2A, CHEK2, CTNNA1, CTNNB1, DCC, DMD, EGFR, ENG, EP300, EPCAM, ERBB2, FBXW7, FGFR3, FLCN, FZD3, GALNT12, GPC6, GREM1, KIT, KRAS, MAP2K4, MAP7, MET, MIER3, MLH1, MLH3, MSH2, MSH3, MSH6, MUTYH, MYO1B, NRAS, PALB2, PIK3CA, PIK3R1, PMS1, PMS2, POLD1, POLE, PTEN, PTPN12, RET, RPS20, SCG5, SLC9A9, SMAD2, SMAD4, SRC, STK11, TCERG1, TCF7L2, TGFBR2, TP53, WBSCR17*

**Suppl. Table 2: Clinical and histopathological baseline characteristics of molecular subgroups in the overall population**

BMI: Body Mass Index; BRAF MT: mutated for B-Raf proto-oncogene, serine/threonine kinase; dMMR: deficient mismatch repair; KRAS MT: mutated for Kirsten Rat Sarcoma; MSI-H: microsatellite instability; MSS microsatellite stability; NRAS MT: mutated for Neuroblastoma ras; pMMR: proficient mismatch repair protein; SD: Standard deviation; WT: Wild Type. In this table, 3 patients with missing MSI Status have been included.

| Characteristic             |  | AB-WT <sub>0</sub> (N=1843) |  | KRAS MT <sub>0</sub> (N=1946) | NRAS MT <sub>0</sub> (N=146) | BRAF MT <sub>0</sub> (N=951) | p-Value |
|----------------------------|--|-----------------------------|--|-------------------------------|------------------------------|------------------------------|---------|
| Age (in years)             |  |                             |  |                               |                              |                              | <0.001  |
| Medium                     |  | 71                          |  | 71                            | 70.5                         | 75                           |         |
| Mean (SD)                  |  | 69.2 (12.1)                 |  | 69.4 (11.8)                   | 68 (12.6)                    | 73.7 (10.3)                  |         |
| Range                      |  | 25 - 95                     |  | 27 - 96                       | 26- 92                       | 29 - 100                     |         |
| Age (categories)           |  |                             |  |                               |                              |                              | <0.001  |
| < 50                       |  | 127 (6.9%)                  |  | 103 (5.3%)                    | 11 (7.5%)                    | 16 (1.7%)                    |         |
| 50 -70                     |  | 704 (38.2%)                 |  | 785 (40.3%)                   | 57 (39.0%)                   | 270 (28.4%)                  |         |
| ≥ 70                       |  | 1012 (54.9%)                |  | 1058 (54.4%)                  | 78 (53.4%)                   | 665 (69.9%)                  |         |
| Sex                        |  |                             |  |                               |                              |                              | <0.001  |
| Female                     |  | 724 (39.4%)                 |  | 870 (44.8%)                   | 66 (45.2%)                   | 642 (67.6%)                  |         |
| Male                       |  | 1112 (60.6%)                |  | 1072 (55.2%)                  | 80 (54.8%)                   | 308 (32.4%)                  |         |
| Missing                    |  | 7                           |  | 4                             | 0                            | 1                            |         |
| CCI                        |  |                             |  |                               |                              |                              | 0.53    |
| < 5                        |  | 1819 (98.7%)                |  | 1924 (98.9%)                  | 146 (100.0%)                 | 938 (98.6%)                  |         |
| ≥ 5                        |  | 24 (1.3%)                   |  | 22 (1.1%)                     | 0 (0.0%)                     | 13 (1.4%)                    |         |
| BMI                        |  |                             |  |                               |                              |                              | 0.14    |
| Mean (SD)                  |  | 26.99 (5.2)                 |  | 26.7 (5.0)                    | 26.5 (4.8)                   | 26.6 (5.1)                   |         |
| Range                      |  | 12.7 - 57.5                 |  | 14.5 - 54.6                   | 15.9 - 42.2                  | 13.8 - 52.5                  |         |
| Missing                    |  | 140                         |  | 169                           | 8                            | 92                           |         |
| BMI (categories)           |  |                             |  |                               |                              |                              | 0.50    |
| < 18.5                     |  | 47 (2.8%)                   |  | 45 (2.5%)                     | 5 (3.6%)                     | 24 (2.8%)                    |         |
| 18.5 - 25                  |  | 602 (35.3%)                 |  | 689 (38.8%)                   | 47 (34.1%)                   | 321 (37.4%)                  |         |
| ≥ 25                       |  | 1054 (61.9%)                |  | 1043 (58.7%)                  | 86 (62.3%)                   | 514 (59.8%)                  |         |
| Missing                    |  | 140                         |  | 169                           | 8                            | 92                           |         |
| T-Stage                    |  |                             |  |                               |                              |                              | 0.45    |
| T 1/2                      |  | 284 (15.4%)                 |  | 285 (14.6%)                   | 16 (11.0%)                   | 149 (15.7%)                  |         |
| T 3/4                      |  | 1559 (84.6%)                |  | 1661 (85.4%)                  | 130 (89.0%)                  | 802 (84.3%)                  |         |
| N-Stage                    |  |                             |  |                               |                              |                              | 0.13    |
| N0                         |  | 1121 (61.1%)                |  | 1128 (58.2%)                  | 82 (56.2%)                   | 539 (57.1%)                  |         |
| N+                         |  | 714 (38.9%)                 |  | 810 (41.8%)                   | 64 (43.8%)                   | 405 (42.9%)                  |         |
| UICC                       |  |                             |  |                               |                              |                              | 0.059   |
| I                          |  | 202 (11.0%)                 |  | 182 (9.4%)                    | 7 (4.8%)                     | 100 (10.5%)                  |         |
| II                         |  | 918 (49.8%)                 |  | 951 (48.9%)                   | 76 (52.1%)                   | 438 (46.1%)                  |         |
| III                        |  | 722 (39.2%)                 |  | 813 (41.8%)                   | 63 (43.2%)                   | 413 (43.4%)                  |         |
| Differential Grade         |  |                             |  |                               |                              |                              | <0.001  |
| G 1/2                      |  | 1486 (80.6%)                |  | 1603 (82.4%)                  | 122 (83.6%)                  | 535 (56.3%)                  |         |
| G 3/4                      |  | 357 (19.4%)                 |  | 343 (17.6%)                   | 24 (16.4%)                   | 416 (43.7%)                  |         |
| Histological Subtype       |  |                             |  |                               |                              |                              | <0.001  |
| Adenocarcinoma             |  | 1721 (95.5%)                |  | 1806 (94.7%)                  | 138 (95.8%)                  | 824 (87.8%)                  |         |
| Mucinous adenocarcinoma    |  | 44 (2.4%)                   |  | 77 (4.0%)                     | 6 (4.2%)                     | 80 (8.5%)                    |         |
| Signet-ring cell carcinoma |  | 7 (0.4%)                    |  | 0 (0.0%)                      | 0 (0.0%)                     | 4 (0.4%)                     |         |
| Others                     |  | 30 (1.7%)                   |  | 24 (1.3%)                     | 0 (0.0%)                     | 30 (3.2%)                    |         |
| Missing                    |  | 41                          |  | 39                            | 2                            | 13                           |         |
| Chemotherapy               |  |                             |  |                               |                              |                              | 0.001   |
| Yes                        |  | 649 (39.5%)                 |  | 723 (41.8%)                   | 53 (43.1%)                   | 288 (33.9%)                  |         |
| No                         |  | 996 (60.5%)                 |  | 1005 (58.2%)                  | 70 (56.9%)                   | 561 (66.1%)                  |         |
| Missing                    |  | 198                         |  | 218                           | 23                           | 102                          |         |
| Localization               |  |                             |  |                               |                              |                              | <0.001  |
| Cecum                      |  | 150 (8.2%)                  |  | 411 (21.5%)                   | 22 (15.2%)                   | 206 (21.8%)                  |         |
| Ascending colon            |  | 335 (18.4%)                 |  | 504 (26.3%)                   | 34 (23.4%)                   | 401 (42.4%)                  |         |
| Hepatic flexure            |  | 114 (6.3%)                  |  | 110 (5.7%)                    | 5 (3.4%)                     | 100 (10.6%)                  |         |
| Transverse colon           |  | 194 (10.7%)                 |  | 154 (8.0%)                    | 11 (7.6%)                    | 106 (11.2%)                  |         |
| Splenic flexure            |  | 70 (3.8%)                   |  | 86 (4.5%)                     | 7 (4.8%)                     | 26 (2.8%)                    |         |
| Descending colon           |  | 138 (7.6%)                  |  | 97 (5.1%)                     | 11 (7.6%)                    | 35 (3.7%)                    |         |
| Sigmoid colon              |  | 761 (41.8%)                 |  | 519 (27.1%)                   | 50 (34.5%)                   | 68 (7.2%)                    |         |
| Rectosigmoid junction      |  | 58 (3.2%)                   |  | 33 (1.7%)                     | 5 (3.4%)                     | 3 (0.3%)                     |         |
| Missing                    |  | 23                          |  | 32                            | 1                            | 6                            |         |
| Sidedness                  |  |                             |  |                               |                              |                              | <0.001  |
| Right                      |  | 793 (43.6%)                 |  | 1179 (61.6%)                  | 72 (49.7%)                   | 813 (86.0%)                  |         |
| Left                       |  | 1027 (56.4%)                |  | 735 (38.4%)                   | 73 (50.3%)                   | 132 (14.0%)                  |         |
| Missing                    |  | 23                          |  | 32                            | 1                            | 6                            |         |
| MSI Status                 |  |                             |  |                               |                              |                              | <0.001  |
| MSS-pMMR                   |  | 1627 (88.3%)                |  | 1787 (91.9%)                  | 139 (95.2%)                  | 312 (32.8%)                  |         |
| MSI-H-dMMR                 |  | 215 (11.7%)                 |  | 157 (8.1%)                    | 7 (4.8%)                     | 639 (67.2%)                  |         |
| Missing                    |  | 1                           |  | 2                             | 0                            | 0                            |         |

**Suppl. Table 3: Clinical and histopathological baseline characteristics of distinct KRAS mutations the MSS and MSI- H cohort**

BMI: Body Mass Index; dMMR: deficient mismatch repair; KRAS MT: mutated for Kirsten Rat Sarcoma; MSI-H: microsatellite instability; MSS microsatellite stability; pMMR: proficient mismatch repair protein; SD: Standard deviation; WT: Wild Type

| Characteristic          | KRAS MT MSS/pMMR  |                   |                   |                   |                   |                   |                   | p-Value | KRAS MT MSI/dMMR |                  |                  |                 |                  |                 |                 | p-Value |
|-------------------------|-------------------|-------------------|-------------------|-------------------|-------------------|-------------------|-------------------|---------|------------------|------------------|------------------|-----------------|------------------|-----------------|-----------------|---------|
|                         | p.G12D<br>(N=533) | p.G13D<br>(N=268) | p.G12V<br>(N=373) | p.G12A<br>(N=103) | p.A146T<br>(N=90) | p.G12C<br>(N=106) | Others<br>(N=278) |         | p.G12D<br>(N=34) | p.G13D<br>(N=44) | p.G12V<br>(N=10) | p.G12A<br>(N=6) | p.A146T<br>(N=9) | p.G12C<br>(N=3) | other<br>(N=46) |         |
| Age (in years)          |                   |                   |                   |                   |                   |                   |                   | 0.74    |                  |                  |                  |                 |                  |                 |                 | 0.30    |
| Median                  | 71                | 70                | 72                | 71                | 72                | 71.5              | 72                |         | 61.5             | 65.6             | 68               | 69.5            | 74               | 77              | 71.5            |         |
| Mean (SD)               | 69.4 (11.5)       | 69 (11.6)         | 70.3 (11.6)       | 70.4 (11.8)       | 68.9 (12.9)       | 70 (9.8)          | 70 (11.3)         |         | 62 (15.1)        | 64.4 (14.3)      | 68.5 (13.0)      | 67.7 (10.5)     | 69 (15.2)        | 78.3 (7.1)      | 68.3 (13.8)     |         |
| Range                   | 31 - 93           | 35 - 93           | 30 - 96           | 33 - 96           | 34 - 92           | 42 - 87           | 37 - 96           |         | 29 - 85          | 27 - 90          | 49 - 94          | 51 - 78         | 43 - 90          | 72 - 86         | 29 - 87         |         |
| Age (categories)        |                   |                   |                   |                   |                   |                   |                   | 0.29    |                  |                  |                  |                 |                  |                 |                 | 0.58    |
| < 50                    | 26 (4.9%)         | 12 (4.5%)         | 18 (4.8%)         | 2 (1.9%)          | 9 (10.0%)         | 1 (0.9%)          | 12 (4.3%)         |         | 7 (20.6%)        | 7 (15.9%)        | 1 (10.0%)        | 0 (0.0%)        | 1 (11.1%)        | 0 (0.0%)        | 5 (10.9%)       |         |
| 50-70                   | 220 (41.3%)       | 115 (42.9%)       | 138 (37.0%)       | 42 (40.8%)        | 32 (35.6%)        | 44 (41.5%)        | 114 (41.0%)       |         | 12 (35.3%)       | 20 (45.5%)       | 5 (50.0%)        | 3 (50.0%)       | 2 (22.2%)        | 0 (0.0%)        | 15 (32.6%)      |         |
| ≥ 70                    | 287 (53.8%)       | 141 (52.6%)       | 217 (58.2%)       | 59 (57.3%)        | 49 (54.4%)        | 61 (57.5%)        | 152 (54.7%)       |         | 15 (44.1%)       | 17 (38.6%)       | 4 (40.0%)        | 3 (50.0%)       | 6 (66.7%)        | 3 (100.0%)      | 26 (56.5%)      |         |
| Sex                     |                   |                   |                   |                   |                   |                   |                   | 0.94    |                  |                  |                  |                 |                  |                 |                 | 0.048   |
| Female                  | 247 (46.3%)       | 119 (44.4%)       | 158 (42.7%)       | 44 (42.7%)        | 39 (43.3%)        | 49 (46.7%)        | 121 (43.5%)       |         | 11 (32.4%)       | 18 (40.9%)       | 5 (50.0%)        | 1 (16.7%)       | 5 (55.6%)        | 2 (66.7%)       | 30 (65.2%)      |         |
| Male                    | 286 (53.7%)       | 149 (55.6%)       | 212 (57.3%)       | 59 (57.3%)        | 51 (56.7%)        | 56 (53.3%)        | 157 (56.5%)       |         | 23 (67.6%)       | 26 (59.1%)       | 5 (50.0%)        | 5 (83.3%)       | 4 (44.4%)        | 1 (33.3%)       | 16 (34.8%)      |         |
| Missing                 | 0                 | 0                 | 3                 | 0                 | 0                 | 1                 | 0                 |         |                  |                  |                  |                 |                  |                 |                 |         |
| CCI                     |                   |                   |                   |                   |                   |                   |                   | 0.47    |                  |                  |                  |                 |                  |                 |                 | 0.87    |
| < 5                     | 526 (98.7%)       | 267 (99.6%)       | 367 (98.4%)       | 102 (99.0%)       | 90 (100.0%)       | 106 (100.0%)      | 273 (98.2%)       |         | 34 (100.0%)      | 43 (97.7%)       | 10 (100.0%)      | 6 (100.0%)      | 9 (100.0%)       | 3 (100.0%)      | 46 (100.0%)     |         |
| ≥ 5                     | 7 (1.3%)          | 1 (0.4%)          | 6 (1.6%)          | 1 (1.0%)          | 0 (0.0%)          | 0 (0.0%)          | 5 (1.8%)          |         | 0 (0.0%)         | 1 (2.3%)         | 0 (0.0%)         | 0 (0.0%)        | 0 (0.0%)         | 0 (0.0%)        | 0 (0.0%)        |         |
| BMI                     |                   |                   |                   |                   |                   |                   |                   | 0.70    |                  |                  |                  |                 |                  |                 |                 | 0.51    |
| Mean (SD)               | 26.674 (5.040)    | 27 (5.7)          | 26.5 (4.8)        | 26.5 (4.2)        | 25.9 (4.2)        | 26.6 (5.0)        | 26.7 (5.0)        |         | 25.1 (4.3)       | 27 (3.9)         | 25.6 (3.7)       | 24.5 (4.4)      | 26.9 (2.5)       | 27.7 (3.3)      | 26.9 (5.4)      |         |
| Range                   | 15.060 - 53.830   | 14.5 - 54.2       | 16.5 - 45.3       | 15.8 - 35.5       | 17.7 - 43.5       | 16.2 - 40.7       | 15.4 - 47.6       |         | 16.7 - 36.6      | 19.6 - 35.7      | 20.6 - 30.9      | 19.5 - 30.4     | 24.1 - 31.0      | 24.2 - 30.8     | 19.8 - 45.2     |         |
| Missing                 | 42                | 24                | 24                | 11                | 6                 | 10                | 31                |         | 4                | 6                | 0                | 1               | 2                | 0               | 6               |         |
| BMI (categories)        |                   |                   |                   |                   |                   |                   |                   | 0.92    |                  |                  |                  |                 |                  |                 |                 | 0.36    |
| < 18.5                  | 12 (2.4%)         | 4 (1.6%)          | 11 (3.2%)         | 1 (1.1%)          | 2 (2.4%)          | 4 (4.2%)          | 5 (2.0%)          |         | 3 (10.0%)        | 0 (0.0%)         | 0 (0.0%)         | 0 (0.0%)        | 0 (0.0%)         | 0 (0.0%)        | 0 (0.0%)        |         |
| 18.5 - 25               | 193 (39.3%)       | 96 (39.3%)        | 131 (37.5%)       | 38 (41.3%)        | 39 (46.4%)        | 37 (38.5%)        | 95 (38.5%)        |         | 13 (43.3%)       | 11 (28.9%)       | 4 (40.0%)        | 2 (40.0%)       | 3 (42.9%)        | 1 (33.3%)       | 14 (35.0%)      |         |
| ≥ 25                    | 286 (58.2%)       | 144 (59.0%)       | 207 (59.3%)       | 53 (57.6%)        | 43 (51.2%)        | 55 (57.3%)        | 147 (59.5%)       |         | 14 (46.7%)       | 27 (71.1%)       | 6 (60.0%)        | 3 (60.0%)       | 4 (57.1%)        | 2 (66.7%)       | 26 (65.0%)      |         |
| Missing                 | 42                | 24                | 24                | 11                | 6                 | 10                | 31                |         | 4                | 6                | 0                | 1               | 2                | 0               | 6               |         |
| T-Stage                 |                   |                   |                   |                   |                   |                   |                   | 0.26    |                  |                  |                  |                 |                  |                 |                 | 0.19    |
| T 1/2                   | 76 (14.3%)        | 50 (18.7%)        | 49 (13.1%)        | 11 (10.7%)        | 14 (15.6%)        | 20 (18.9%)        | 36 (12.9%)        |         | 2 (5.9%)         | 4 (9.1%)         | 3 (30.0%)        | 0 (0.0%)        | 0 (0.0%)         | 1 (33.3%)       | 5 (10.9%)       |         |
| T 3/4                   | 457 (85.7%)       | 218 (81.3%)       | 324 (86.9%)       | 92 (89.3%)        | 76 (84.4%)        | 86 (81.1%)        | 242 (87.1%)       |         | 32 (94.1%)       | 40 (90.9%)       | 7 (70.0%)        | 6 (100.0%)      | 9 (100.0%)       | 2 (66.7%)       | 41 (89.1%)      |         |
| N-Stage                 |                   |                   |                   |                   |                   |                   |                   | 0.34    |                  |                  |                  |                 |                  |                 |                 | 0.87    |
| N0                      | 311 (58.3%)       | 140 (52.8%)       | 209 (56.3%)       | 54 (52.9%)        | 52 (58.4%)        | 53 (50.0%)        | 169 (60.8%)       |         | 25 (73.5%)       | 34 (77.3%)       | 7 (70.0%)        | 6 (100.0%)      | 7 (77.8%)        | 2 (66.7%)       | 33 (73.3%)      |         |
| N+                      | 222 (41.7%)       | 125 (47.2%)       | 162 (43.7%)       | 48 (47.1%)        | 37 (41.6%)        | 53 (50.0%)        | 109 (39.2%)       |         | 9 (26.5%)        | 10 (22.7%)       | 3 (30.0%)        | 0 (0.0%)        | 2 (22.2%)        | 1 (33.3%)       | 12 (26.7%)      |         |
| UICC                    |                   |                   |                   |                   |                   |                   |                   | 0.063   |                  |                  |                  |                 |                  |                 |                 | 0.46    |
| I                       | 52 (9.8%)         | 32 (11.9%)        | 35 (9.4%)         | 4 (3.9%)          | 12 (13.3%)        | 12 (11.3%)        | 18 (6.5%)         |         | 2 (5.9%)         | 3 (6.8%)         | 2 (20.0%)        | 0 (0.0%)        | 0 (0.0%)         | 1 (33.3%)       | 2 (4.3%)        |         |
| II                      | 259 (48.6%)       | 113 (42.2%)       | 172 (46.1%)       | 48 (46.6%)        | 42 (46.7%)        | 41 (38.7%)        | 151 (54.3%)       |         | 22 (67.6%)       | 32 (72.7%)       | 5 (50.0%)        | 6 (100.0%)      | 7 (77.8%)        | 1 (33.3%)       | 31 (67.4%)      |         |
| III                     | 222 (41.7%)       | 123 (45.9%)       | 166 (44.5%)       | 51 (49.5%)        | 36 (40.0%)        | 53 (50.0%)        | 109 (39.2%)       |         | 9 (26.5%)        | 9 (20.5%)        | 3 (30.0%)        | 0 (0.0%)        | 2 (22.2%)        | 1 (33.3%)       | 13 (28.3%)      |         |
| Differential Grade      |                   |                   |                   |                   |                   |                   |                   | 0.79    |                  |                  |                  |                 |                  |                 |                 | 0.74    |
| G 1/2                   | 441 (82.7%)       | 229 (85.4%)       | 315 (84.5%)       | 84 (81.6%)        | 72 (80.0%)        | 86 (81.1%)        | 236 (84.9%)       |         | 23 (67.6%)       | 30 (68.2%)       | 8 (80.0%)        | 5 (83.3%)       | 5 (55.6%)        | 3 (100.0%)      | 30 (65.2%)      |         |
| G 3/4                   | 92 (17.3%)        | 39 (14.6%)        | 58 (15.5%)        | 19 (18.4%)        | 18 (20.0%)        | 20 (18.9%)        | 42 (15.1%)        |         | 11 (32.4%)       | 14 (31.8%)       | 2 (20.0%)        | 1 (16.7%)       | 4 (44.4%)        | 0 (0.0%)        | 16 (34.8%)      |         |
| Histological Subtype    |                   |                   |                   |                   |                   |                   |                   | 0.12    |                  |                  |                  |                 |                  |                 |                 | 0.96    |
| Adenocarcinoma          | 485 (92.9%)       | 251 (95.1%)       | 346 (95.8%)       | 98 (98.0%)        | 85 (94.4%)        | 101 (97.1%)       | 264 (96.0%)       |         | 31 (91.2%)       | 40 (90.9%)       | 9 (100.0%)       | 5 (83.3%)       | 9 (100.0%)       | 3 (100.0%)      | 38 (88.4%)      |         |
| Mucinous adenocarcinoma | 28 (5.4%)         | 6 (2.3%)          | 12 (3.3%)         | 2 (2.0%)          | 5 (5.6%)          | 3 (2.9%)          | 9 (3.3%)          |         | 2 (5.9%)         | 4 (9.1%)         | 0 (0.0%)         | 1 (16.7%)       | 0 (0.0%)         | 0 (0.0%)        | 4 (9.3%)        |         |
| Others                  | 9 (1.7%)          | 7 (2.7%)          | 3 (0.8%)          | 0 (0.0%)          | 0 (0.0%)          | 0 (0.0%)          | 2 (0.7%)          |         | 1 (2.9%)         | 0 (0.0%)         | 0 (0.0%)         | 0 (0.0%)        | 0 (0.0%)         | 0 (0.0%)        | 1 (2.3%)        |         |
| Missing                 | 11                | 4                 | 12                | 3                 | 0                 | 2                 | 3                 |         | 0                | 0                | 1                | 0               | 0                | 0               | 3               |         |
| Chemotherapy            |                   |                   |                   |                   |                   |                   |                   | 0.46    |                  |                  |                  |                 |                  |                 |                 | 0.60    |
| Yes                     | 190 (40.7%)       | 116 (48.3%)       | 146 (43.8%)       | 43 (46.7%)        | 32 (40.0%)        | 39 (41.5%)        | 101 (40.1%)       |         | 9 (30.0%)        | 11 (30.6%)       | 0 (0.0%)         | 1 (16.7%)       | 2 (25.0%)        | 1 (33.3%)       | 11 (28.2%)      |         |
| No                      | 277 (59.3%)       | 124 (51.7%)       | 187 (56.2%)       | 49 (53.3%)        | 48 (60.0%)        | 55 (58.5%)        | 151 (59.9%)       |         | 21 (70.0%)       | 25 (69.4%)       | 10 (100.0%)      | 5 (83.3%)       | 6 (75.0%)        | 2 (66.7%)       | 28 (71.8%)      |         |
| Missing                 | 66                | 28                | 40                | 11                | 10                | 12                | 26                |         | 4                | 8                | 0                | 0               | 1                | 0               | 7               |         |
| Localisation            |                   |                   |                   |                   |                   |                   |                   | <0.001  |                  |                  |                  |                 |                  |                 |                 | 0.18    |
| Cecum                   | 122 (23.2%)       | 69 (26.2%)        | 69 (18.9%)        | 17 (16.7%)        | 22 (24.7%)        | 19 (18.3%)        | 53 (19.4%)        |         | 4 (12.5%)        | 10 (22.7%)       | 2 (22.2%)        | 2 (33.3%)       | 2 (22.2%)        | 1 (33.3%)       | 9 (19.6%)       |         |
| Ascending colon         | 156 (29.7%)       | 59 (22.4%)        | 77 (21.1%)        | 20 (19.6%)        | 29 (32.6%)        | 27 (26.0%)        | 76 (27.8%)        |         | 6 (18.8%)        | 12 (27.3%)       | 3 (33.3%)        | 1 (16.7%)       | 2 (22.2%)        | 2 (66.7%)       | 22 (47.8%)      |         |
| Hepatic flexure         | 13 (2.5%)         | 18 (6.8%)         | 17 (4.7%)         | 14 (13.7%)        | 4 (4.5%)          | 12 (11.5%)        | 18 (6.6%)         |         | 1 (3.1%)         | 1 (2.3%)         | 1 (11.1%)        | 0 (0.0%)        | 2 (22.2%)        | 0 (0.0%)        | 5 (10.9%)       |         |
| Transverse colon        | 50 (9.5%)         | 18 (6.8%)         | 24 (6.6%)         | 10 (9.8%)         | 10 (11.2%)        | 9 (8.7%)          | 15 (5.5%)         |         | 5 (15.6%)        | 4 (9.1%)         | 0 (0.0%)         | 1 (16.7%)       | 1 (22.2%)        | 0 (0.0%)        | 3 (6.5%)        |         |
| Splenic flexure         | 19 (3.6%)         | 10 (3.8%)         | 20 (5.5%)         | 3 (2.9%)          | 7 (7.9%)          | 4 (3.8%)          | 12 (4.4%)         |         | 4 (12.5%)        | 4 (9.1%)         | 0 (0.0%)         | 1 (16.7%)       | 0 (0.0%)         | 0 (0.0%)        | 1 (2.2%)        |         |
| Descending colon        | 28 (5.3%)         | 11 (4.2%)         | 23 (6.3%)         | 6 (5.9%)          | 1 (1.1%)          | 3 (2.9%)          | 12 (4.4%)         |         | 7 (21.9%)        | 3 (6.8%)         | 0 (0.0%)         | 0 (0.0%)        | 0 (0.0%)         | 0 (0.0%)        | 1 (2.2%)        |         |
| Sigmoid colon           | 132 (25.1%)       | 74 (28.1%)        | 129 (35.3%)       | 28 (27.5%)        | 16 (18.0%)        | 26 (25.0%)        | 79 (28.9%)        |         | 5 (15.6%)        | 10 (22.7%)       | 3 (33.3%)        | 1 (16.7%)       | 1 (11.1%)        | 0 (0.0%)        | 5 (10.9%)       |         |
| Rectosigmoid junction   | 6 (1.1%)          | 4 (1.5%)          | 6 (1.6%)          | 4 (3.9%)          | 0 (0.0%)          | 4 (3.8%)          | 8 (2.9%)          |         | 0 (0.0%)         | 0 (0.0%)         | 0 (0.0%)         | 0 (0.0%)        | 0 (0.0%)         | 0 (0.0%)        | 0 (0.0%)        |         |
| Missing                 | 7                 | 5                 | 8                 | 1                 | 1                 | 2                 | 5                 |         | 2                | 0                | 1                | 0               | 0                | 0               | 0               |         |
| Sideliness              |                   |                   |                   |                   |                   |                   |                   | <0.001  |                  |                  |                  |                 |                  |                 |                 | 0.020   |
| Right                   | 341 (64.8%)       | 164 (62.4%)       | 187 (51.2%)       | 61 (59.8%)        | 65 (73.0%)        | 67 (64.4%)        | 162 (59.3%)       |         | 16 (50.0%)       | 27 (61.4%)       | 6 (66.7%)        | 4 (66.7%)       | 8 (88.9%)        | 3 (100.0%)      | 39 (84.8%)      |         |
| Left                    | 185 (35.2%)       | 99 (37.6%)        | 178 (48.8%)       | 41 (40.2%)        | 24 (27.0%)        | 37 (35.6%)        | 111 (40.7%)       |         | 16 (50.0%)       | 17 (38.6%)       | 3 (33.3%)        | 2 (33.3%)       | 1 (11.1%)        | 0 (0.0%)        | 7 (15.2%)       |         |
| Missing                 | 7                 | 5                 | 8                 | 1                 | 1                 | 2                 | 5                 |         | 2                | 0                | 1                | 0               | 0                | 0               | 0               |         |

**Suppl. Table 4: Mutations of MMR Genes in the MSI cohort in relation to BRAF V600 MT**

WT: Wild Type; MT: mutated

| Gene | Level      | BRAF V600 WT |      |      | BRAF V600 MT |      |      |
|------|------------|--------------|------|------|--------------|------|------|
|      |            | N            | %    | Σ%   | N            | %    | Σ%   |
| MLH1 | pathogenic | 59           | 22.6 | 22.6 | 30           | 8.3  | 8.3  |
|      | WT         | 163          | 73.4 | 100  | 332          | 91.7 | 100  |
| MSH2 | pathogenic | 42           | 18.9 | 18.9 | 23           | 6.3  | 6.3  |
|      | WT         | 180          | 81.1 | 100  | 339          | 93.7 | 100  |
| PMS2 | pathogenic | 35           | 15.8 | 15.8 | 35           | 9.7  | 9.7  |
|      | WT         | 187          | 84.2 | 100  | 327          | 90.3 | 100  |
| MSH6 | pathogenic | 48           | 21.6 | 21.6 | 64           | 17.7 | 17.7 |
|      | WT         | 174          | 78.4 | 100  | 298          | 82.3 | 100  |

**Suppl. Table 5 : Mutations of POLE and POLD1 in relation to KRAS and BRAF status**

WT: Wild Type; MT: mutated; MSI: microsatellite instability; MSS: microsatellite stable; KRAS MT: mutated for Kirsten Rat  
POLE: DNA Polymerase Epsilon; POLD1: DNA polymerase delta

| KRAS /<br>BRAF status | Gene  | Level      | MSI |      |      | MSS  |      |     |
|-----------------------|-------|------------|-----|------|------|------|------|-----|
|                       |       |            | N   | %    | Σ%   | N    | %    | Σ%  |
| KRAS MT<br>BRAF WT    | POLD1 | pathogenic | 16  | 21.9 | 21.9 | 38   | 3.8  | 3.8 |
|                       |       | WT         | 57  | 78.1 | 100  | 949  | 96.2 | 100 |
|                       | POLE  | pathogenic | 5   | 6.8  | 6.8  | 11   | 1.1  | 1.1 |
|                       |       | WT         | 68  | 93.2 | 100  | 976  | 98.9 | 100 |
| KRAS WT<br>BRAF MT    | POLD1 | pathogenic | 97  | 26.6 | 26.6 | 8    | 3.7  | 3.7 |
|                       |       | WT         | 267 | 73.3 | 100  | 209  | 96.3 | 100 |
|                       | POLE  | pathogenic | 23  | 6.3  | 6.3  | 3    | 1.4  | 1.4 |
|                       |       | WT         | 341 | 93.7 | 100  | 214  | 98.6 | 100 |
| KRAS WT<br>BRAF WT    | POLD1 | pathogenic | 45  | 31.7 | 31.7 | 31   | 2.8  | 2.8 |
|                       |       | WT         | 97  | 68.3 | 100  | 1094 | 97.2 | 100 |
|                       | POLE  | pathogenic | 19  | 13.4 | 13.4 | 13   | 1.2  | 1.2 |
|                       |       | WT         | 123 | 86.6 | 100  | 1112 | 98.8 | 100 |
